# Supplementary material for: Neighborhood Socioeconomic Deprivation Associated with Fat Mass and Weight Status in Youth
Source: PubMed Central journal article supplement (PMC7503851; doi:10.3390/ijerph17176421), 2020-09-03
Supplement: ijerph-17-06421-s001.pdf [file ijerph-17-06421-s001.pdf]

**Table S1.** Census tract variables used to construct neighborhood socioeconomic deprivation index score; American Community Survey 5-year estimates, 2008–2012.

| <b>Domain</b>         | <b>ACS Variables</b>                                           | <b>Factor Loading Coefficients ‡</b> | <b>Standardized Scoring Coefficients †</b> |
|-----------------------|----------------------------------------------------------------|--------------------------------------|--------------------------------------------|
| Education             | % of total population with less than a high school education * | 0.69789                              | 0.13488                                    |
| Occupation            | % of working class *                                           | 0.73356                              | 0.14555                                    |
|                       | % of civilian labor force unemployed *                         | 0.74070                              | 0.12883                                    |
| Housing Conditions    | % of household ownership                                       | 0.40686                              | -0.02221                                   |
|                       | % of vacant households                                         | 0.09261                              | -0.01269                                   |
|                       | % of households with more than 1 person per room               | 0.29262                              | 0.02743                                    |
|                       | % of households in poverty *                                   | 0.87287                              | 0.11806                                    |
|                       | % of female headed households with dependent children *        | 0.69174                              | 0.07541                                    |
|                       | % of households with income <\$30,000 *                        | 0.91099                              | 0.13163                                    |
|                       | % of households with public assistance *                       | 0.51923                              | 0.10387                                    |
|                       | % of households with no car *                                  | 0.71970                              | 0.08187                                    |
|                       | % of households with no phone *                                | 0.44788                              | 0.05394                                    |
|                       | % of households with incomplete plumbing                       | 0.12188                              | -0.02924                                   |
| Income and Poverty    | % of households with no kitchen                                | 0.00341                              | -0.06318                                   |
|                       | Income disparity *                                             | 0.84599                              | 0.13443                                    |
| Racial Composition    | % of population below the federal poverty line *               | 0.84468                              | 0.10973                                    |
|                       | % of population non-Hispanic African American *                | 0.71688                              | 0.11403                                    |
| Residential Stability | % of population Hispanic                                       | 0.02200                              | -0.02905                                   |
|                       | % of residents aged ≥ 65 years                                 | -0.12764                             | -0.01385                                   |
|                       | % of persons living in same residence for ≥ 5 years            | -0.04373                             | 0.08845                                    |
|                       | % of foreign born                                              | -0.15830                             | -0.07625                                   |

\* Variables selected to generate the deprivation index (Cronbach's alpha = 0.93); ‡ factor loading coefficients (for variables' selection) and † standardized scoring coefficients (for variables' weighting) from the first common factor.

**Table S2.** Unadjusted and adjusted least squared means of fat mass index among TRACK participants by neighborhood socioeconomic deprivation (SED) quartiles.<sup>1</sup>

| Model                       | Neighborhood Socioeconomic Deprivation, Quartiles (Q) |                          |             |                            |
|-----------------------------|-------------------------------------------------------|--------------------------|-------------|----------------------------|
|                             | Q1 (Affluence)                                        | Q2                       | Q3          | Q4 (Deprivation)           |
| Unadjusted <sup>2</sup>     | 5.61 (0.27) <sup>a</sup>                              | 5.74 (0.20) <sup>b</sup> | 6.15 (0.26) | 6.83 (0.40) <sup>a,b</sup> |
| Adjusted <sup>3</sup>       | 5.59 (0.28)                                           | 5.68 (0.20)              | 6.02 (0.27) | 6.47 (0.40)                |
| Fully Adjusted <sup>4</sup> | 5.64 (0.31) <sup>c</sup>                              | 5.85 (0.24)              | 6.06 (0.30) | 6.64 (0.41) <sup>c</sup>   |

<sup>1</sup> Model derived estimates presented as adjusted least squared means and standard error (SE); Superscript letters indicate significant differences between adjusted least squared means,  $p < 0.05$ ; <sup>2</sup> Unadjusted model accounted for participants clustered within schools; <sup>3</sup> Model adjusted for age, sex, race/ethnicity, parent education; and accounted for participants clustered within schools; <sup>4</sup> Model adjusted for age, sex, race/ethnicity, parent education, MVPA minutes per hour, sedentary minutes per hour, and diet quality; and accounted for participants clustered within schools. <sup>a</sup> unadjusted model-derived estimate for fat mass index is significantly lower among youth residing in Q1 compared to youth residing in Q4; <sup>b</sup> unadjusted model derived estimate for fat mass index is significantly lower among youth residing in Q2 compared to youth residing in Q4; <sup>c</sup> adjusted model-derived estimate for fat mass index is significantly lower among youth residing in Q1 compared to youth residing in Q4

**Table S3.** Odds of overweight/obesity among 5th grade TRACK participants by neighborhood socioeconomic deprivation (SED) quartiles.

| Models                               | Neighborhood SED, Quartiles        |                      |                      |          |                 |
|--------------------------------------|------------------------------------|----------------------|----------------------|----------|-----------------|
|                                      | Q1                                 | Q2                   | Q3                   | Q4 (dep) | Linear Trend    |
| Model 1. Unadjusted <sup>1</sup>     | <b>0.51</b><br><b>(0.30, 0.86)</b> | 0.73<br>(0.45, 1.17) | 0.82<br>(0.49, 1.36) | 1.0      | <b>&lt;0.05</b> |
| Model 2. Adjusted <sup>2</sup>       | <b>0.57</b><br><b>(0.33, 0.97)</b> | 0.74<br>(0.45, 1.22) | 0.80<br>(0.48, 1.34) | 1.0      | 0.05            |
| Model 3. + MVPA <sup>2</sup>         | <b>0.54</b><br><b>(0.32, 0.95)</b> | 0.70<br>(0.42, 1.16) | 0.70<br>(0.41, 1.20) | 1.0      | <b>&lt;0.05</b> |
| Model 4: + Sedentary <sup>2</sup>    | <b>0.53</b><br><b>(0.31, 0.93)</b> | 0.69<br>(0.42, 1.14) | 0.72<br>(0.42, 1.21) | 1.0      | <b>&lt;0.05</b> |
| Model 5: + Diet <sup>2</sup>         | <b>0.54</b><br><b>(0.31, 0.93)</b> | 0.73<br>(0.45, 1.20) | 0.79<br>(0.47, 1.32) | 1.0      | 0.06            |
| Model 6: Fully Adjusted <sup>3</sup> | <b>0.51</b><br><b>(0.29, 0.90)</b> | 0.67<br>(0.40, 1.12) | 0.67<br>(0.39, 1.15) | 1.0      | <b>&lt;0.05</b> |

<sup>1</sup> Unadjusted model accounted for participants clustered within schools; <sup>2</sup> Model adjusted for age, sex, race/ethnicity, parent education; and accounted for participants clustered within schools; <sup>3</sup> Model adjusted for age, sex, race/ethnicity, parent education, MVPA, sedentary, and diet quality; and accounted for participants clustered within schools. Bold typeface indicates significant odds ratio.
